# Supplementary material
Source: PubMed Central journal article supplement (PMC7252690)
Supplement: supp_8.2.E407_2020-0069-1-at.pdf [file supp_8.2.E407_2020-0069-1-at.pdf]

**Appendix 1 (as supplied by the authors): Standardized forms for initial and follow-up assessments**

**Initial Assessment**

**Date of Video OTN Assessment:**

| <b>Demographics</b> |                                                      |
|---------------------|------------------------------------------------------|
| Name                |                                                      |
| Age                 |                                                      |
| Sex                 | F M Not known                                        |
| Pregnant            | Y N                                                  |
| HCW                 | Y N Site of Exposure/Date of Exposure:<br>DD/MM/2020 |

| <b>Onset of Symptoms</b>                           |                       |
|----------------------------------------------------|-----------------------|
| Symptom onset date of first symptom                | DD/MM/2020            |
| Symptom onset date of first fever (>38.0)          | DD/MM/2020            |
| Date of COVID Test Positive                        | DD/MM/2020            |
| Travel in the 14 days prior to first symptom onset | Y N                   |
| If Yes: Country                                    |                       |
| City/Geographic Area                               |                       |
| Dates of Travel                                    | DD/MM/2020-DD/MM/2020 |
| Exposure to COVID Positive Case                    | Y N                   |
| Date of Exposure                                   |                       |
| Other comments:                                    |                       |

| <b>Past Medical History / Comorbidities</b> |     |       |
|---------------------------------------------|-----|-------|
|                                             | Y/N | Notes |
| Cardiac disease                             |     |       |
| Chronic lung Disease                        |     |       |
| Asthma                                      |     |       |
| Smoker                                      |     |       |
| Chronic kidney disease                      |     |       |
| Moderate or severe liver disease            |     |       |
| Chronic neurological issues                 |     |       |
| Malignancy                                  |     |       |
| Chronic hematologic disease                 |     |       |
| HIV                                         |     |       |
| Diabetes                                    |     |       |
| Hypertension                                |     |       |
| Rheumatic disorder                          |     |       |

|                 |  |  |
|-----------------|--|--|
| Malnutrition    |  |  |
| Obesity         |  |  |
| Other comments: |  |  |

|                      |  |
|----------------------|--|
| <b>Medications:</b>  |  |
| Antivirals           |  |
| Other antimicrobials |  |
| Other medications    |  |

|                   |            |
|-------------------|------------|
| <b>Allergies:</b> | Y N Notes: |
|-------------------|------------|

|                                     |     |       |
|-------------------------------------|-----|-------|
| <b>Social History</b>               |     |       |
|                                     | Y/N | Notes |
| <b>Other residents in household</b> |     |       |
| <b>ADLs intact at baseline?</b>     |     |       |
| <b>IADLs intact at baseline?</b>    |     |       |

|                                                                                    |     |       |
|------------------------------------------------------------------------------------|-----|-------|
| <b>Current Symptoms</b>                                                            |     |       |
|                                                                                    | Y/N | Notes |
| Fever                                                                              |     |       |
| Sore Throat                                                                        |     |       |
| Runny Nose                                                                         |     |       |
| Cough                                                                              |     |       |
| Are you short of breath?                                                           |     |       |
| Are you breathing harder or faster when doing nothing at all?                      |     |       |
| Are you breathing faster than normal?                                              |     |       |
| Does anything make you breathless today that didn't make you breathless yesterday? |     |       |
| Chills/Rigors                                                                      |     |       |
| Conjunctivitis                                                                     |     |       |
| Ear Pain                                                                           |     |       |

|                    |  |  |
|--------------------|--|--|
| Anosmia            |  |  |
| Dysgeusia          |  |  |
| Sputum             |  |  |
| Hemoptysis         |  |  |
| Wheezing           |  |  |
| Chest Pain         |  |  |
| Myalgia            |  |  |
| Arthralgia         |  |  |
| Abdominal Pain     |  |  |
| Nausea/Vomiting    |  |  |
| Diarrhea           |  |  |
| Adenopathy         |  |  |
| Rash               |  |  |
| Fatigue/Malaise    |  |  |
| Headache           |  |  |
| Confusion          |  |  |
| Depression/Anxiety |  |  |
| Insomnia           |  |  |
| Anorexia           |  |  |
| Other comments:    |  |  |

| <b>Physical Exam</b>        |     |       |
|-----------------------------|-----|-------|
|                             | Y/N | Notes |
| Temperature                 |     |       |
| Increased work of breathing |     |       |
| Cyanosis                    |     |       |
| Indrawing                   |     |       |
| Walk Test                   |     |       |
| O2 sat reading at rest      |     |       |
| Other comments              |     |       |

| <b>Investigations</b> |  |
|-----------------------|--|
| Bloodwork             |  |
| Chest x-ray           |  |
| Microbiology          |  |
| Other comments        |  |

**Impression and Plan:**

Clinical Status: Stable VS Improving VS Deteriorating

Disposition Plan: Maintain at home VS transfer to hospital

Other recommendations:

- 

Name of Physician:

Toronto Public Health Contact and Number:

## Follow-up Assessment

### **Date of Video OTN Assessment:**

| <b>Demographics</b> |   |   |                   |
|---------------------|---|---|-------------------|
| Name                |   |   |                   |
| Age                 |   |   |                   |
| Sex                 | F | M | Not known         |
| Pregnant            | Y | N |                   |
| HCW                 | Y | N | Site of Exposure: |

|                                            |  |
|--------------------------------------------|--|
| <b>Number of days since symptom onset:</b> |  |
|--------------------------------------------|--|

| <b>Treatments:</b>   |  |
|----------------------|--|
| Antivirals           |  |
| Other antimicrobials |  |
| Other medications    |  |

| <b>Current Symptoms</b>                                                            |     |       |
|------------------------------------------------------------------------------------|-----|-------|
|                                                                                    | Y/N | Notes |
| Fever                                                                              |     |       |
| Sore Throat                                                                        |     |       |
| Runny Nose                                                                         |     |       |
| Cough                                                                              |     |       |
| Are you short of breath?                                                           |     |       |
| Are you breathing harder or faster when doing nothing at all?                      |     |       |
| Are you breathing faster than usual?                                               |     |       |
| Does anything make you breathless today that didn't make you breathless yesterday? |     |       |
| Chills/Rigors                                                                      |     |       |
| Conjunctivitis                                                                     |     |       |
| Ear Pain                                                                           |     |       |
| Anosmia                                                                            |     |       |
| Dysgusia                                                                           |     |       |
| Sputum                                                                             |     |       |
| Hemoptysis                                                                         |     |       |

|                    |  |  |
|--------------------|--|--|
| Wheezing           |  |  |
| Chest Pain         |  |  |
| Myalgia            |  |  |
| Arthralgia         |  |  |
| Abdominal Pain     |  |  |
| Nausea/Vomiting    |  |  |
| Diarrhea           |  |  |
| Adenopathy         |  |  |
| Rash               |  |  |
| Fatigue/Malaise    |  |  |
| Headache           |  |  |
| Confusion          |  |  |
| Depression/Anxiety |  |  |
| Insomnia           |  |  |
| Anorexia           |  |  |
| Other comments:    |  |  |

| <b>Physical Exam</b>        |     |       |
|-----------------------------|-----|-------|
|                             | Y/N | Notes |
| Temperature                 |     |       |
| Increased work of breathing |     |       |
| Cyanosis                    |     |       |
| Indrawing                   |     |       |
| Walk Test                   |     |       |
| O2 sat at rest              |     |       |
| Other comments              |     |       |

| <b>Investigations</b> |  |
|-----------------------|--|
| Bloodwork             |  |
| Chest x-ray           |  |
| Microbiology          |  |
| Other comments        |  |

**Impression and Plan:**

Clinical Status: Stable VS Improving VS Deteriorating

Disposition Plan: Maintain at home VS transfer to hospital

Other recommendations:

Name of Physician:

Toronto Public Health Contact and Number:
