# Supplementary material
Source: PubMed Central journal article supplement (PMC7252690)
Supplement: supp_8.2.E407_2020-0069-original-submission.pdf [file supp_8.2.E407_2020-0069-original-submission.pdf]

# Canadian Medical Association Journal

*Research*

## A Virtual Care Model for Outpatients Diagnosed with COVID-19

Philip W. Lam, BScPhm, MD<sup>a,b</sup>, Prateek Sehgal, MD<sup>a</sup>, Nisha Andany, MD, MPH<sup>a,b</sup>,  
Samira Mubareka, MD<sup>a,b</sup>, Andrew E. Simor, MD<sup>a,b</sup>, Omar Ozaldin, MSc<sup>c</sup>, Jerome A.  
Leis, MD, MSc<sup>a,b</sup>, Nick Daneman, MD, MSc<sup>a,b</sup>, Adrienne K. Chan, MD, MPH<sup>a,b</sup>

- a Department of Medicine, University of Toronto, Toronto, Ontario, Canada
- b Division of Infectious Diseases, Sunnybrook Health Sciences Centre, Toronto, Ontario, Canada
- c Toronto Public Health, Toronto, Ontario, Canada

**Running Title:** COVID-19 outpatient virtual care

**Corresponding Author:**

Philip Lam, BScPhm, MD  
Sunnybrook Health Sciences Centre  
2075 Bayview Avenue  
Toronto ON M4N 3M5  
Tel: 416-480-6100  
E-mail: philip.lam@sunnybrook.ca

**Word Count:** 2116

**Number of Figures and Tables:** 5

**Keywords:** COVID-19, coronavirus, outpatient, virtual care

**Funding:** None

**Declaration of Author(s) Competing Interests:** None

## Abstract

**Background:** The majority of individuals with COVID-19 present initially with a mild illness and are typically discharged home to self-isolation while diagnostic tests are pending. In the subset of outpatients whose tests subsequently return positive for COVID-19, there are challenges to providing patient counseling and support surrounding their diagnosis, or re-assessment in the event of clinical deterioration.

**Methods:** COVID-19 Expansion to Outpatients (COVIDEO) was a virtual care feasibility pilot study developed through an intra-disciplinary collaboration between Microbiology, Infectious Diseases (ID), and Infection Prevention and Control at Sunnybrook Health Sciences Centre (SHSC), and Toronto Public Health. The primary aims of this project were to provide ID assessments to at least 90% of outpatients from SHSC diagnosed with COVID-19 using COVIDEO, and to reduce unplanned transfers to hospital in these patients to less than 10%.

**Results:** From March 1 to March 27, 2020, 50 persons under investigation assessed at SHSC and discharged home to self-isolation tested positive for COVID-19. All 50 (100%) outpatients were successfully assessed by ID using COVIDEO. Of those served by COVIDEO, 32 (64%) patients were assessed using the Ontario Telemedicine Network platform; the remainder were assessed by telephone. Six (12%) patients demonstrated a change in clinical status requiring transfer to hospital; only one transfer was unplanned.

**Interpretation:** With the imminent expectation of widespread escalation of the pandemic, COVIDEO represents a tool that can assist clinicians in providing high-quality care to patients diagnosed with COVID-19 while keeping physical assessments within the healthcare system to a minimum.

## Introduction

In December 2019, an outbreak of acute respiratory illness secondary to a novel coronavirus (SARS-CoV-2) originated in Wuhan, China. As of April 4, 2020, coronavirus disease (COVID-19) has caused a global pandemic resulting in more than 1,000,000 cases and close to 57,000 deaths (1). This pandemic has placed immense, and in some cases overwhelming, strain on healthcare systems around the world.

The majority of individuals with COVID-19 present initially with a mild illness and do not require hospitalization (2). After initial assessment and sample collection, these patients are typically discharged home to self-isolation while results of diagnostic tests are pending. This approach is critical to reducing the burden on the healthcare system and limiting spread of COVID-19 to other vulnerable patients and staff in hospital (3). However, in the subset of outpatients whose tests subsequently return positive for COVID-19, there are challenges to providing patient counseling and support surrounding their diagnosis, or re-assessment in the event of clinical deterioration.

To address this gap, we developed COVID-19 Expansion to Outpatients (COVIDEO), a virtual care feasibility pilot study aimed at providing ongoing care to outpatients with COVID-19. The benefits of virtual care to improve accessibility to infectious diseases consultation and assessments has been increasingly recognized (4). For instance, guidelines now recognize virtual care as a complementary tool to monitor safety and response to therapy in those receiving outpatient parenteral antibiotic therapy (5,6).

Given the availability of fixed broadband or mobile internet access to 99% of Canadian households (7), we hypothesized that COVIDEO could be safely used for outpatient

1  
2  
3 management of COVID-19. In this report, we describe our experience with the first 50 patients  
4 managed using COVIDEO. Given the accessibility of virtual care platforms, this model of care  
5 would be rapidly scalable by other practitioners and institutions. With the imminent expectation  
6 of widespread escalation of the pandemic, this represents a tool that can assist clinicians in  
7 providing high-quality care to COVID-19 patients while keeping physical assessments within the  
8 healthcare system to a minimum.  
9  
10  
11  
12  
13  
14  
15  
16  
17  
18  
19  
20

## 21 **Methodology**

22  
23 Sunnybrook Health Sciences Centre (SHSC) is a 627-bed academic tertiary care centre  
24 located in Toronto, Ontario. On January 25, 2020, the first Canadian imported case of COVID-  
25 19 was diagnosed at SHSC (8). In anticipation of the growing number of patients diagnosed with  
26 COVID-19 at SHSC, COVID-19 Expansion to Outpatients (COVIDEO) was a virtual care  
27 feasibility pilot study developed through an intra-disciplinary collaboration between  
28 Microbiology, Infectious Diseases, and Infection Prevention and Control (IP&C) at SHSC, and  
29 Toronto Public Health (TPH) (Figure 1). All positive COVID-19 tests at SHSC or the SHSC  
30 Assessment centre were notified to IP&C who then subsequently notified the Infectious Diseases  
31 (ID) physician. The communication process between IP&C and the ID physician took place 7  
32 days per week. All inpatients diagnosed with COVID-19 were assessed by the ID physician on  
33 call who followed the patient upon discharge using COVIDEO. All outpatients diagnosed with  
34 COVID-19 at SHSC were contacted by an ID physician for assessment and counseling using the  
35 Ontario Telemedicine Network (OTN) virtual care platform. OTN is a government-funded, non-  
36 profit, organization that currently serves as the primary platform for virtual care services in  
37 Ontario (9). Advancements in OTN technology now allow physicians to perform virtual care  
38  
39  
40  
41  
42  
43  
44  
45  
46  
47  
48  
49  
50  
51  
52  
53  
54  
55  
56  
57  
58  
59  
60

1  
2  
3 visits with patients in their home through their personal devices (personal computer or mobile  
4 device) without the need for travel to a telemedicine studio. Patients who were unable or  
5 declined the use of OTN were assessed by telephone. COVIDEO care was maintained through a  
6 rotating weekly schedule among four ID physicians.  
7  
8  
9  
10

11  
12  
13 Standardized intake and assessment forms were developed to assess each patient  
14 (Supplement 1). In addition to exposure history, comorbidities and a review of systems, a  
15 functional assessment consisting of ambulation and exercise capacity were used to detect any  
16 impending deterioration in respiratory status. In patients deemed stable, follow-up ID  
17 assessments were conducted on a weekly basis, at minimum, until clearance by TPH. In the  
18 intervening period, patients were also contacted by their TPH case worker by telephone, with ID  
19 being notified with any concerns. Patients who were deemed to require more frequent follow up  
20 were contacted up to twice a day; the exact schedule of follow-up was at the discretion of the  
21 most responsible ID physician based on clinical judgment and guided by the patients' clinical  
22 status. In the event of clinical deterioration requiring hospital transfer, the ID physician  
23 coordinated with IP&C, TPH, and the hospital emergency department triage or COVID-19 ward  
24 to ensure that transportation and admission to hospital was completed in a controlled and safe  
25 manner. The decision to sign off a patient from further COVIDEO follow-up was based on  
26 physician determination that there had been clear clinical improvement and no remaining risk of  
27 future deterioration. COVIDEO was launched on March 1, 2020.  
28  
29  
30  
31  
32  
33  
34  
35  
36  
37  
38  
39  
40  
41  
42  
43  
44  
45  
46  
47

48 The primary aims of this project were to provide ID assessments to at least 90% of  
49 outpatients from SHSC diagnosed with COVID-19 using COVIDEO, and to reduce unplanned  
50 transfers to hospital in these patients to less than 10%. We aimed for rapid dissemination, and so  
51 selected a sample size of 50 patients which would be sufficient to estimate these target  
52  
53  
54  
55  
56  
57  
58  
59  
60

1  
2  
3 proportions with a margin of error of 9% and 95% confidence. Since the primary focus of this  
4  
5 project was to improve the quality of care provided to outpatients with COVID-19, this study  
6  
7 was exempted from research ethics approval.  
8  
9  
10  
11  
12

## 13 **Results**

14  
15  
16 From March 1 to March 27, 2020, 50 persons under investigation (PUIs) assessed at  
17  
18 SHSC and discharged home to self-isolation tested positive for COVID-19. During the same  
19  
20 time period, 13 PUIs were admitted to SHSC who tested positive for COVID-19. All 50 (100%)  
21  
22 outpatients were successfully assessed by ID using COVIDEO. Of those served by COVIDEO,  
23  
24 32 (64%) patients were assessed using the OTN platform; the remainder were assessed by  
25  
26 telephone. The median (IQR) age of the patients was 40 (30.5, 59.5) years and 26 (52%) had  
27  
28 travelled in the preceding 14 days. The most common presenting symptoms were cough (68%),  
29  
30 fatigue (64%) and myalgia (42%). Demographic and clinical characteristics of these outpatients  
31  
32 diagnosed with COVID-19 are summarized in Table 1.  
33  
34  
35  
36  
37

38 Patient recruitment increased over time, with 3 enrolled within the first week, 18 in the  
39  
40 second week, 13 in the third week, and 16 in the fourth week (Figure 2). Even within the short  
41  
42 initial timespan of this intervention (first 50 patients enrolled within 27 days), there were already  
43  
44 substantial shifts in demographic characteristics over time. The second half (as compared to the  
45  
46 first half) of the cohort were less likely to report a travel history (18/25 vs 8/25,  $p=0.004$ ), and  
47  
48 more likely to be healthcare workers (3/25 vs 14/25,  $p=0.001$ ).  
49  
50  
51

52 The median (IQR) time from viral swab collection to first COVIDEO assessment was 2  
53  
54 (1, 2) days. Of the 26 patients who were signed off from further COVIDEO follow-up at the time  
55  
56  
57  
58  
59  
60

1  
2  
3 of this manuscript, the median (IQR) time from first COVIDEO assessment to sign-off was 12.5  
4 (8.75, 16) days. The care trajectory for each of the 50 patients assessed in our study is  
5  
6 summarized in Figure 3.  
7  
8

9  
10 Six (12%) patients demonstrated a change in clinical status requiring transfer to hospital  
11 (Table 2); only one transfer was unplanned. Four out of the 6 patients were admitted to hospital.  
12  
13 The reasons for transfer included changes in respiratory status (3/6), chest pain (1/6), relative  
14  
15 hypotension (1/6), and need for isolation due to ongoing hemodialysis (1/6). As of April 4, 2020,  
16  
17 1/50 (2%) patients were admitted to intensive care, and 0/50 (0%) had died.  
18  
19  
20  
21  
22  
23  
24  
25

## 26 **Discussion**

27  
28  
29 Implementation of a virtual care model for monitoring outpatients diagnosed with  
30  
31 COVID-19 was effective in providing care and counseling for patients in self-isolation. The use  
32  
33 of virtual care in medicine has become an attractive mitigation strategy to minimize unnecessary  
34  
35 patient travel to healthcare institutions for medical care. Through a collaborative approach, we  
36  
37 have demonstrated that this model can also be successfully utilized in outpatients diagnosed with  
38  
39 COVID-19 under self-isolation.  
40  
41  
42

43  
44 COVIDEO allows healthcare providers to plan for a safe and controlled hospital transfer  
45  
46 in those demonstrating signs of clinical deterioration (12% in our cohort). Prior experiences with  
47  
48 the SARS epidemic have highlighted that uncontrolled hospitalizations of acutely deteriorating  
49  
50 patients (due to lack of adherence to infection control procedures) significantly increases the risk  
51  
52 of nosocomial transmission (10). Use of COVIDEO also allowed the ability to assess household  
53  
54 contacts for symptoms and initiate appropriate investigations and contact tracing through TPH in  
55  
56  
57  
58  
59  
60

1  
2  
3 an effort to reduce community spread. As the burden on TPH has increased, the COVIDEO  
4 service has been able to inform the patient of their positive diagnosis within 24 hours of receipt  
5 of lab notification, allowing for timely notification and confirmation of required self-isolation  
6 procedures.  
7  
8  
9  
10  
11

12  
13 Patients generally found COVIDEO to be an important and helpful service. There is a  
14 tremendous degree of anxiety and uncertainty that can accompany a diagnosis of COVID-19.  
15 Having a physician provide frequent reassessment, and education around the various  
16 manifestations of illness, expected clinical course, and which symptoms should prompt concern,  
17 tended to alleviate anxiety. Physicians providing COVIDEO care were able to emphasize and  
18 elaborate on self-isolation procedures for patients and their household contacts, even prior to  
19 their being contacted by TPH. In addition, all patients were instructed on how to reach either  
20 their most responsible ID physician, or the ID physician on-call, at any time. Having relatively  
21 easy access to a physician 24 hours a day, 7 days a week, provided an additional level of  
22 reassurance.  
23  
24  
25  
26  
27  
28  
29  
30  
31  
32  
33  
34  
35

36  
37 Health care workers comprised 34% of COVIDEO patients and this was primarily  
38 because of the changes in local testing criteria that prioritized health care workers self-  
39 identifying with symptoms for testing in order to mitigate nosocomial transmission. It is  
40 important to note that in this early cohort, the majority of these cases were related to importation  
41 from travel to areas with community transmission, with some also related to local community  
42 transmission; none were related to nosocomial exposure.  
43  
44  
45  
46  
47  
48  
49  
50

51 There are several limitations to COVIDEO. First and most importantly, as the number of  
52 patients diagnosed with COVID-19 increase exponentially (Figure 1), this model will inevitably  
53 become more time and labour intensive. However, we feel that COVIDEO could be sustainable,  
54  
55  
56  
57  
58  
59  
60



1  
2  
3 scaled and adapted for use by other primary care providers to manage outpatients diagnosed with  
4 COVID-19, potentially through a rotating roster of physicians or nurse practitioners linked to  
5 assessment centres providing testing and willing to provide continuity of care for the duration of  
6 illness for individual patients. Importantly, for those physicians, and residents, who may not be  
7 able to assist in direct care of individuals with confirmed or suspected COVID-19 due to  
8 underlying comorbidities, this virtual care platform may provide them with an opportunity to  
9 contribute to COVID-related care in a safe, yet impactful, way. Secondly, due to the  
10 implementation of COVIDEO early in the pandemic to improve the quality of care, no baseline  
11 or comparator data was available to evaluate its incremental impact on outcomes. We plan to  
12 formally evaluate our intervention using a quasi-experimental study design once we have  
13 accumulated a large enough cohort. Thirdly, marginalized populations who may not have access  
14 to a phone or internet, in particular those who are underhoused, may be challenging to manage.  
15 In addition, the short timeframe between viral swab collection and first COVIDEO assessment  
16 was dependent on a rapid turnaround time for COVID-19 testing at our institution. Settings  
17 where COVID-19 test result reporting is delayed may attenuate the benefits of early assessments  
18 in reducing unplanned transfers to hospital. Lastly, symptom management without physical  
19 examination may not be sensitive enough to anticipate all cases of clinical deterioration; to  
20 account for this we have subsequently introduced mini-home oxygen saturation monitors into the  
21 program.

22  
23  
24  
25  
26  
27  
28  
29  
30  
31  
32  
33  
34  
35  
36  
37  
38  
39  
40  
41  
42  
43  
44  
45  
46  
47  
48 As the pandemic has evolved, the overall epidemiology of patients diagnosed with  
49 COVID-19 has transitioned from predominantly imported cases in individuals healthy enough to  
50 travel, to community-transmission. The utility of COVIDEO may become more relevant,  
51 particularly as older patients, or patients with chronic medical illness are sent home for self-  
52  
53  
54  
55  
56  
57  
58  
59  
60

1  
2  
3 isolation after their initial presentation to the healthcare system. The changing demographic of  
4 patients followed in COVIDEO is also reflective of institutional decisions that have been made  
5 around prioritizing tests and rationing limited testing capacity to sicker patients as well as  
6 individuals who work in professions (e.g. health care, or long term care facilities) that are “high  
7 risk” for outbreak or institutional spread.  
8  
9  
10  
11  
12  
13  
14

15 The exponential increase and rapidly changing demographic of patients in this  
16 COVIDEO cohort is a microcosm of the rapidly progressing pandemic in Canada and globally.  
17 It is difficult to predict the final toll of COVID-19, but it appears that virtual care may be a  
18 feasible way to manage patients with mild to moderate symptoms in their own homes. This  
19 approach serves to reassure patients, offers early detection of clinical deterioration, and helps  
20 lessen the burden on strained acute care facilities.  
21  
22  
23  
24  
25  
26  
27  
28  
29  
30  
31  
32  
33  
34  
35  
36  
37  
38  
39  
40  
41  
42  
43  
44  
45  
46  
47  
48  
49  
50  
51  
52  
53  
54  
55  
56  
57  
58  
59  
60

## References

1. World Health Organization. Coronavirus disease 2019 (COVID-19): Situation Report – 75. World Health Organization; 2020 [updated 2020 Apr 4; cited 2020 Apr 4]. Available from: [https://www.who.int/docs/default-source/coronaviruse/situation-reports/20200404-sitrep-75-covid-19.pdf?sfvrsn=99251b2b\\_2](https://www.who.int/docs/default-source/coronaviruse/situation-reports/20200404-sitrep-75-covid-19.pdf?sfvrsn=99251b2b_2)
2. Novel Coronavirus Pneumonia Emergency Response Epidemiology Team. [The Epidemiological Characteristics of an Outbreak of 2019 Novel Coronavirus Diseases (COVID-19) in China]. *Zhonghua Liu Xing Bing Xue Za Zhi.* 2020;41(2):145–151.
3. Lin M, Beliaevsky A, Katz K, Powis JE, Ng W, Williams V, et al. What can early Canadian experience screening for COVID-19 teach us about how to prepare for a pandemic? [published online ahead of print, 2020 Mar 6]. *CMAJ.* 2020;192(12):E314–E318.
4. Burnham JP, Fritz SA, Yaeger LH, Colditz GA. Telemedicine Infectious Diseases Consultations and Clinical Outcomes: A Systematic Review. *Open Forum Infect Dis.* Dec 2019;6(12):ofz517.
5. Young JD, Abdel-Massih R, Herchline T, McCurdy L, Moyer KJ, Scott JD, et al. Infectious Diseases Society of America Position Statement on Telehealth and Telemedicine as Applied to the Practice of Infectious Diseases. *Clin Infect Dis.* 2019 Apr 24;68(9):1437-1443.
6. Chapman ALN, Patel S, Horner C, Gilchrist M, Seaton RA. Outpatient parenteral antimicrobial therapy: updated recommendations from the UK. *J Antimicrob Chemother.* 2019 Nov 1;74(11):3125-3127.

- 1  
2  
3 7. Canadian Radio-television and Telecommunications Commission. Who is covered by  
4  
5 broadband and mobile networks across Canada? Government of Canada; 2020 [updated  
6  
7 2020 Jan; cited 2020 Apr 1]. Available from: <https://crtc.gc.ca/pubs/cmr2019-en.pdf>  
8  
9
- 10 8. Silverstein WK, Stroud L, Cleghorn GE, Leis JA. First imported case of 2019 novel  
11  
12 coronavirus in Canada, presenting as mild pneumonia. *Lancet*. 2020 Feb  
13  
14 29;395(10225):734.  
15  
16
- 17 9. Brown EM. The Ontario Telemedicine Network: a case report. *Telemed J E Health*. May  
18  
19 2013;19(5):373–376.  
20  
21
- 22 10. Raboud, J, Shigayeva A, McGeer A, Bontovics E, Chapman M, Gravel D, et al. Risk  
23  
24 Factors for SARS Transmission from Patients Requiring Intubation: A Multicentre  
25  
26 Investigation in Toronto, Canada. *PLoS One*. 2010 May;5(5): e10717.  
27  
28  
29  
30  
31  
32  
33  
34  
35  
36  
37  
38  
39  
40  
41  
42  
43  
44  
45  
46  
47  
48  
49  
50  
51  
52  
53  
54  
55  
56  
57  
58  
59  
60

**Table 1. Characteristics of the first 50 outpatients diagnosed with COVID-19 managed with COVIDEO**

| Characteristic                                                      | No. (%)         |
|---------------------------------------------------------------------|-----------------|
| Demographic characteristics                                         |                 |
| Age (years, IQR)                                                    | 44 (30.5, 59.5) |
| Sex (% male)                                                        | 33 (66.0)       |
| Median time from symptom onset to healthcare assessment (days, IQR) | 3 (1.5, 5.0)    |
| Recent Travel within 14 days of symptom onset                       | 26 (52.0)       |
| Austria                                                             | 3               |
| Canada (within country)                                             | 2               |
| Cayman Islands                                                      | 1               |
| Colombia                                                            | 1               |
| Dominican Republic                                                  | 1               |
| Egypt                                                               | 2               |
| England                                                             | 1               |
| Germany                                                             | 1               |
| Iran                                                                | 3               |
| Japan                                                               | 1               |
| Peru                                                                | 2               |
| Switzerland                                                         | 1               |
| United Arab Emirates                                                | 2               |
| United States                                                       | 10              |
| Healthcare worker                                                   | 17 (34.0)       |
| Community acquisition                                               | 9               |
| Recent Travel within 14 days of symptom onset                       | 8               |
| Nosocomial acquisition                                              | 0               |
| Pregnant                                                            | 0               |
| Co-morbidities                                                      |                 |
| Asthma                                                              | 3 (6)           |

|    |                                  |         |
|----|----------------------------------|---------|
| 1  |                                  |         |
| 2  |                                  |         |
| 3  | Cardiac disease                  | 1 (2)   |
| 4  |                                  |         |
| 5  | Chronic hematologic disease      | 2 (4)   |
| 6  |                                  |         |
| 7  | Chronic kidney disease           | 2 (4)   |
| 8  |                                  |         |
| 9  | Chronic lung disease             | 1 (2)   |
| 10 |                                  |         |
| 11 | Chronic neurologic disease       | 1 (2)   |
| 12 |                                  |         |
| 13 | Diabetes                         | 3 (6)   |
| 14 | HIV                              | 0       |
| 15 | Hypertension                     | 11 (22) |
| 16 |                                  |         |
| 17 | Malignancy                       | 5 (10)  |
| 18 |                                  |         |
| 19 | Malnutrition                     | 0       |
| 20 |                                  |         |
| 21 | Moderate to severe liver disease | 0       |
| 22 |                                  |         |
| 23 | Obesity                          | 1 (2)   |
| 24 | Rheumatic Disorder               | 1 (2)   |
| 25 |                                  |         |
| 26 | Smoker                           | 5 (10)  |
| 27 |                                  |         |
| 28 | Symptomatology                   |         |
| 29 | Abdominal pain                   | 8 (16)  |
| 30 |                                  |         |
| 31 | Adenopathy                       | 0       |
| 32 | Anorexia                         | 21 (42) |
| 33 |                                  |         |
| 34 | Arthralgia                       | 5 (10)  |
| 35 |                                  |         |
| 36 | Chest pain                       | 7 (14)  |
| 37 |                                  |         |
| 38 | Chills or Rigors                 | 18 (36) |
| 39 |                                  |         |
| 40 | Confusion                        | 1 (2)   |
| 41 |                                  |         |
| 42 | Conjunctivitis                   | 3 (6)   |
| 43 |                                  |         |
| 44 | Cough                            | 34 (68) |
| 45 |                                  |         |
| 46 | Depression and anxiety           | 9 (18)  |
| 47 |                                  |         |
| 48 | Diarrhea                         | 15 (30) |
| 49 |                                  |         |
| 50 | Dyspnea                          | 10 (20) |
| 51 |                                  |         |
| 52 | Fatigue/malaise                  | 32 (64) |
| 53 |                                  |         |
| 54 | Fever                            | 19 (38) |
| 55 |                                  |         |
| 56 | Headache                         | 22 (44) |
| 57 |                                  |         |
| 58 | Hemoptysis                       | 0       |
| 59 |                                  |         |
| 60 |                                  |         |

1  
2  
3  
4  
5  
6  
7  
8  
9  
10  
11  
12  
13  
14  
15  
16  
17  
18  
19  
20  
21  
22  
23  
24  
25  
26  
27  
28  
29  
30  
31  
32  
33  
34  
35  
36  
37  
38  
39  
40  
41  
42  
43  
44  
45  
46  
47  
48  
49  
50  
51  
52  
53  
54  
55  
56  
57  
58  
59  
60

|                                                          |         |
|----------------------------------------------------------|---------|
| Insomnia                                                 | 13 (26) |
| Myalgia                                                  | 21 (42) |
| Nausea and vomiting                                      | 10 (20) |
| Otalgia                                                  | 5 (10)  |
| Pharyngitis                                              | 19 (38) |
| Rash                                                     | 0       |
| Rhinorrhea                                               | 13 (26) |
| Sputum production                                        | 16 (32) |
| Wheezing                                                 | 2 (4)   |
| Investigations                                           |         |
| Bloodwork drawn                                          | 13 (26) |
| Median white blood cell count (x 10 <sup>9</sup> /liter) | 4.9     |
| Median lymphocyte count (x 10 <sup>9</sup> /liter)       | 0.9     |
| Chest x-ray completed                                    | 15 (30) |
| Abnormal chest x-ray findings                            | 11      |
| Bilateral infiltrates                                    | 7       |

---

**Table 2. Characteristics of outpatients diagnosed with COVID-19 managed with virtual care subsequently transferred back to hospital**

| <b>Characteristic</b>                              | <b>No. (%)</b>   |
|----------------------------------------------------|------------------|
| Number of patients transferred to hospital         | 6 (12)           |
| Age of transferred patients (years, IQR)           | 61 (56.5, 64.75) |
| Sex of transferred patients (% male)               | 5 (83.3)         |
| Median time from diagnosis to transfer (days, IQR) | 4 (2.25, 6.5)    |
| Number of patients admitted to hospital            | 4 (8)            |
| Number of patients admitted to ICU                 | 1 (2)            |

Confidential



1  
2  
3 **Figure 1. COVIDEO process map**  
4  
5  
6  
7

8  
9 ED = Emergency Department, ID = Infectious Diseases, IP&C = Infection Prevention and  
10 Control, TPH = Toronto Public Health  
11  
12  
13  
14  
15  
16  
17  
18  
19  
20  
21  
22  
23  
24  
25  
26  
27  
28  
29  
30  
31  
32  
33  
34  
35  
36  
37  
38  
39  
40  
41  
42  
43  
44  
45  
46  
47  
48  
49  
50  
51  
52  
53  
54  
55  
56  
57  
58  
59  
60

Confidential

1  
2  
3  
4  
5  
6  
7  
8  
9  
10  
11  
12  
13  
14  
15  
16  
17  
18  
19  
20  
21  
22  
23  
24  
25  
26  
27  
28  
29  
30  
31  
32  
33  
34  
35  
36  
37  
38  
39  
40  
41  
42  
43  
44  
45  
46  
47  
48  
49  
50  
51  
52  
53  
54  
55  
56  
57  
58  
59  
60

**Figure 2. Case count for the 50 outpatients diagnosed with COVID-19 assessed by COVIDEO**

The vertical dotted line signifies a change to COVID-19 testing criteria at SHSC in response to increasing case counts.

Confidential

**Figure 3. Care trajectory for the 50 outpatients diagnosed with COVID-19 assessed by COVIDEO up until April 2, 2020.**

Confidential

1  
2  
3  
4  
5  
6  
7  
8  
9  
10  
11  
12  
13  
14  
15  
16  
17  
18  
19  
20  
21  
22  
23  
24  
25  
26  
27  
28  
29  
30  
31  
32  
33  
34  
35  
36  
37  
38  
39  
40  
41  
42  
43  
44  
45  
46  
47  
48  
49  
50  
51  
52  
53  
54  
55  
56  
57  
58  
59  
60

1  
2  
3  
4  
5  
6  
7  
8  
9  
10  
11  
12  
13  
14  
15  
16  
17  
18  
19  
20  
21  
22  
23  
24  
25  
26  
27  
28  
29  
30  
31  
32  
33  
34  
35  
36  
37  
38  
39  
40  
41  
42  
43  
44  
45  
46  
47  
48  
49  
50  
51  
52  
53  
54  
55  
56  
57  
58  
59  
60

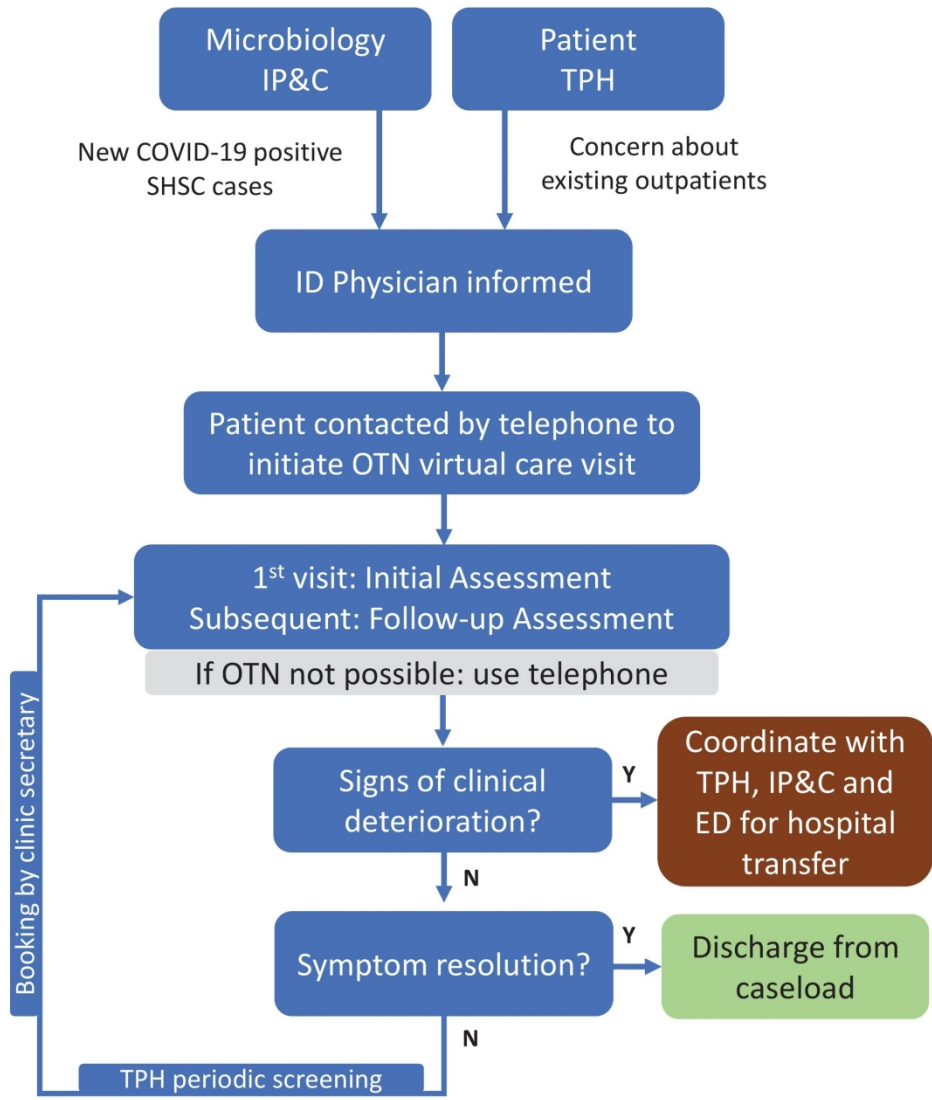

Figure 1. COVIDEO process map

ED = Emergency Department, ID = Infectious Diseases, IP&C = Infection Prevention and Control, TPH = Toronto Public Health

215x248mm (300 x 300 DPI)

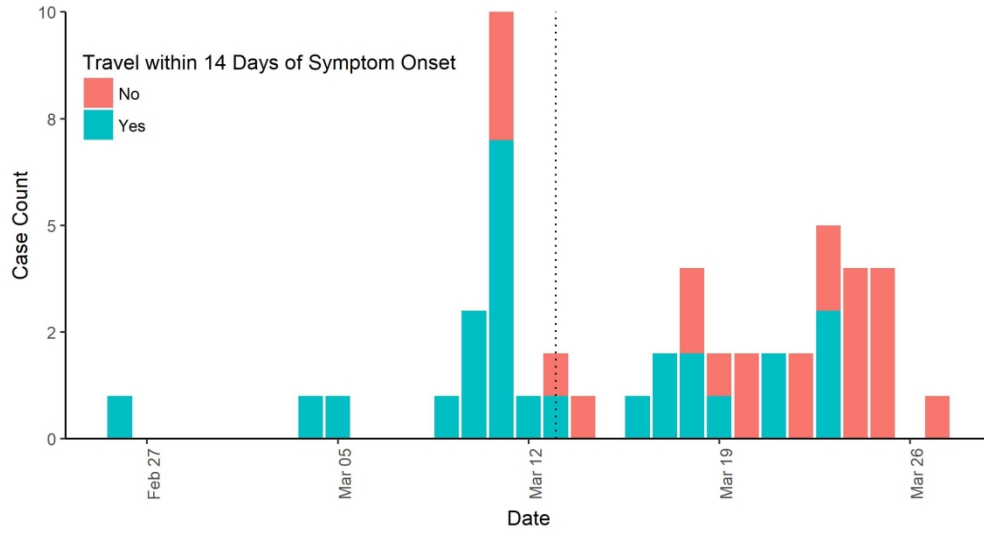

Figure 2. Case count for the 50 outpatients diagnosed with COVID-19 assessed by COVIDEO

The vertical dotted line signifies a change to COVID-19 testing criteria at SHSC in response to increasing case counts.

190x101mm (300 x 300 DPI)

1  
2  
3  
4  
5  
6  
7  
8  
9  
10  
11  
12  
13  
14  
15  
16  
17  
18  
19  
20  
21  
22  
23  
24  
25  
26  
27  
28  
29  
30  
31  
32  
33  
34  
35  
36  
37  
38  
39  
40  
41  
42  
43  
44  
45  
46  
47  
48  
49  
50  
51  
52  
53  
54  
55  
56  
57  
58  
59  
60

### Unable to Convert Image

The dimensions of this image (in pixels) are too large to be converted. For this image to convert, the total number of pixels (height x width) must be less than 40,000,000 (40 megapixels).

Figure 3. Care trajectory for the 50 outpatients diagnosed with COVID-19 assessed by COVIDEO up until April 2, 2020.

## Initial Assessment

### Date of Video OTN Assessment:

| <b>Demographics</b> |   |   |                   |
|---------------------|---|---|-------------------|
| Name                |   |   |                   |
| Age                 |   |   |                   |
| Sex                 | F | M | Not known         |
| Pregnant            | Y | N |                   |
| HCW                 | Y | N | Site of Exposure: |

| <b>Onset of Symptoms</b>                           |                           |
|----------------------------------------------------|---------------------------|
| Symptom onset date of first symptom                | DD/MM/YYYY                |
| Symptom onset date of first fever (>38.0)          | DD/MM/YYYY                |
| Date of COVID Test Positive                        | DD/MM/YYYY                |
| Travel in the 14 days prior to first symptom onset | Y N                       |
| If Yes: Country                                    |                           |
| City/Geographic Area                               |                           |
| Dates of Travel                                    | DD/MM/YYYY-<br>DD/MM/YYYY |
| Other comments:                                    |                           |

| <b>Past Medical History / Comorbidities</b> |     |       |
|---------------------------------------------|-----|-------|
|                                             | Y/N | Notes |
| Cardiac disease                             |     |       |
| Chronic lung Disease                        |     |       |
| Asthma                                      |     |       |
| Smoker                                      |     |       |
| Chronic kidney disease                      |     |       |
| Moderate or severe liver disease            |     |       |
| Chronic neurological issues                 |     |       |
| Malignancy                                  |     |       |
| Chronic hematologic disease                 |     |       |
| HIV                                         |     |       |
| Diabetes                                    |     |       |
| Hypertension                                |     |       |
| Rheumatic disorder                          |     |       |
| Malnutrition                                |     |       |
| Obesity                                     |     |       |
| Other comments:                             |     |       |

1  
2  
3  
4  
5  
6  
7  
8  
9  
10  
11  
12  
13  
14  
15  
16  
17  
18  
19  
20  
21  
22  
23  
24  
25  
26  
27  
28  
29  
30  
31  
32  
33  
34  
35  
36  
37  
38  
39  
40  
41  
42  
43  
44  
45  
46  
47  
48  
49  
50  
51  
52  
53  
54  
55  
56  
57  
58  
59  
60

|                      |  |
|----------------------|--|
| <b>Medications:</b>  |  |
| Antivirals           |  |
| Other antimicrobials |  |
| Other medications    |  |

|                   |   |   |        |
|-------------------|---|---|--------|
| <b>Allergies:</b> | Y | N | Notes: |
|-------------------|---|---|--------|

|                                     |     |       |
|-------------------------------------|-----|-------|
| <b>Social History</b>               |     |       |
|                                     | Y/N | Notes |
| <b>Other residents in household</b> |     |       |
| <b>ADLs intact at baseline?</b>     |     |       |
| <b>IADLs intact at baseline?</b>    |     |       |

|                         |     |       |
|-------------------------|-----|-------|
| <b>Current Symptoms</b> |     |       |
|                         | Y/N | Notes |
| Fever                   |     |       |
| Sore Throat             |     |       |
| Runny Nose              |     |       |
| Cough                   |     |       |
| Shortness of Breath     |     |       |
|                         |     |       |
| Chills/Rigors           |     |       |
| Conjunctivitis          |     |       |
| Ear Pain                |     |       |
| Sputum                  |     |       |
| Hemoptysis              |     |       |
| Wheezing                |     |       |
| Chest Pain              |     |       |
| Myalgia                 |     |       |
| Arthralgia              |     |       |
| Abdominal Pain          |     |       |
| Nausea/Vomiting         |     |       |
| Diarrhea                |     |       |
| Adenopathy              |     |       |
| Rash                    |     |       |
| Fatigue/Malaise         |     |       |
| Headache                |     |       |
| Confusion               |     |       |
| Depression/Anxiety      |     |       |



|                 |  |  |
|-----------------|--|--|
| Insomnia        |  |  |
| Anorexia        |  |  |
| Other comments: |  |  |

| <b>Physical Exam</b>        |     |       |
|-----------------------------|-----|-------|
|                             | Y/N | Notes |
| Temperature                 |     |       |
| Increased work of breathing |     |       |
| Cyanosis                    |     |       |
| Indrawing                   |     |       |
| Walk Test                   |     |       |
| Other comments              |     |       |

| <b>Investigations</b> |  |
|-----------------------|--|
| Bloodwork             |  |
| Chest x-ray           |  |
| Microbiology          |  |
| Other comments        |  |

**Impression and Plan:**

Clinical Status: Stable VS Improving VS Deteriorating

Disposition Plan: Maintain at home VS transfer to hospital

Other recommendations:

- 

Name of Physician:

Toronto Public Health Contact and Number:

**Follow-up Assessment**

**Date of Video OTN Assessment:**

| <b>Demographics</b> |   |   |                   |
|---------------------|---|---|-------------------|
| Name                |   |   |                   |
| Age                 |   |   |                   |
| Sex                 | F | M | Not known         |
| Pregnant            | Y | N |                   |
| HCW                 | Y | N | Site of Exposure: |

|                                            |  |
|--------------------------------------------|--|
| <b>Number of days since symptom onset:</b> |  |
|--------------------------------------------|--|

| <b>Treatments:</b>   |  |
|----------------------|--|
| Antivirals           |  |
| Other antimicrobials |  |
| Other medications    |  |

| <b>Current Symptoms</b> |     |       |
|-------------------------|-----|-------|
|                         | Y/N | Notes |
| Fever                   |     |       |
| Sore Throat             |     |       |
| Runny Nose              |     |       |
| Cough                   |     |       |
| Shortness of Breath     |     |       |
|                         |     |       |
| Chills/Rigors           |     |       |
| Conjunctivitis          |     |       |
| Ear Pain                |     |       |
| Sputum                  |     |       |
| Hemoptysis              |     |       |
| Wheezing                |     |       |
| Chest Pain              |     |       |
| Myalgia                 |     |       |
| Arthralgia              |     |       |
| Abdominal Pain          |     |       |
| Nausea/Vomiting         |     |       |
| Diarrhea                |     |       |
| Adenopathy              |     |       |
| Rash                    |     |       |
| Fatigue/Malaise         |     |       |
| Headache                |     |       |
| Confusion               |     |       |
| Depression/Anxiety      |     |       |
| Insomnia                |     |       |

|                 |  |  |
|-----------------|--|--|
| Anorexia        |  |  |
| Other comments: |  |  |

| <b>Physical Exam</b>        |     |       |
|-----------------------------|-----|-------|
|                             | Y/N | Notes |
| Temperature                 |     |       |
| Increased work of breathing |     |       |
| Cyanosis                    |     |       |
| Indrawing                   |     |       |
| Walk Test                   |     |       |
| Other comments              |     |       |

| <b>Investigations</b> |  |
|-----------------------|--|
| Bloodwork             |  |
| Chest x-ray           |  |
| Microbiology          |  |
| Other comments        |  |

**Impression and Plan:**

Clinical Status: Stable VS Improving VS Deteriorating

Disposition Plan: Maintain at home VS transfer to hospital

Other recommendations:

Name of Physician:

Toronto Public Health Contact and Number:

**Revised Standards for Quality Improvement Reporting Excellence (SQUIRE 2.0)  
September 15, 2015**

| <b>Text Section and Item Name</b> | <b>Section or Item Description</b>                                                                                                                                                                                                                                                                                                                                                                                                                                                                                                                                                                                                                                                                                                                                                                                                                                                                                                                                                                      |                                                                                                                                                                                                                     |
|-----------------------------------|---------------------------------------------------------------------------------------------------------------------------------------------------------------------------------------------------------------------------------------------------------------------------------------------------------------------------------------------------------------------------------------------------------------------------------------------------------------------------------------------------------------------------------------------------------------------------------------------------------------------------------------------------------------------------------------------------------------------------------------------------------------------------------------------------------------------------------------------------------------------------------------------------------------------------------------------------------------------------------------------------------|---------------------------------------------------------------------------------------------------------------------------------------------------------------------------------------------------------------------|
| <b>Notes to authors</b>           | <ul style="list-style-type: none"> <li>• The SQUIRE guidelines provide a framework for reporting new knowledge about how to improve healthcare</li> <li>• The SQUIRE guidelines are intended for reports that describe system level work to improve the quality, safety, and value of healthcare, and used methods to establish that observed outcomes were due to the intervention(s).</li> <li>• A range of approaches exists for improving healthcare. SQUIRE may be adapted for reporting any of these.</li> <li>• Authors should consider every SQUIRE item, but it may be inappropriate or unnecessary to include every SQUIRE element in a particular manuscript.</li> <li>• The SQUIRE Glossary contains definitions of many of the key words in SQUIRE.</li> <li>• The Explanation and Elaboration document provides specific examples of well-written SQUIRE items, and an in-depth explanation of each item.</li> <li>• Please cite SQUIRE when it is used to write a manuscript.</li> </ul> | <p><b>As you review the manuscript, place a checkmark in this column for each SQUIRE item that is appropriately addressed in the manuscript. Remember that not every item is necessary in every manuscript.</b></p> |
| <b>Title and Abstract</b>         |                                                                                                                                                                                                                                                                                                                                                                                                                                                                                                                                                                                                                                                                                                                                                                                                                                                                                                                                                                                                         |                                                                                                                                                                                                                     |
| <b>1. Title</b>                   | Indicate that the manuscript concerns an initiative to improve healthcare (broadly defined to include the quality, safety, effectiveness, patient-centeredness, timeliness, cost, efficiency, and equity of healthcare)                                                                                                                                                                                                                                                                                                                                                                                                                                                                                                                                                                                                                                                                                                                                                                                 | Page 1                                                                                                                                                                                                              |
| <b>2. Abstract</b>                | <ol style="list-style-type: none"> <li>a. Provide adequate information to aid in searching and indexing</li> <li>b. Summarize all key information from various sections of the text using the abstract format of the intended publication or a structured summary such as: background, local problem, methods, interventions, results, conclusions</li> </ol>                                                                                                                                                                                                                                                                                                                                                                                                                                                                                                                                                                                                                                           | Page 2                                                                                                                                                                                                              |

|                                        |                                                                                                                                                                                                                                                                                                                                                                                                                  |          |
|----------------------------------------|------------------------------------------------------------------------------------------------------------------------------------------------------------------------------------------------------------------------------------------------------------------------------------------------------------------------------------------------------------------------------------------------------------------|----------|
| <b>Introduction</b>                    | <i>Why did you start?</i>                                                                                                                                                                                                                                                                                                                                                                                        |          |
| <b>3. Problem Description</b>          | Nature and significance of the local problem                                                                                                                                                                                                                                                                                                                                                                     | Page 3   |
| <b>4. Available knowledge</b>          | Summary of what is currently known about the problem, including relevant previous studies                                                                                                                                                                                                                                                                                                                        | Page 3   |
| <b>5. Rationale</b>                    | Informal or formal frameworks, models, concepts, and/or theories used to explain the problem, any reasons or assumptions that were used to develop the intervention(s), and reasons why the intervention(s) was expected to work                                                                                                                                                                                 | Page 3   |
| <b>6. Specific aims</b>                | Purpose of the project and of this report                                                                                                                                                                                                                                                                                                                                                                        | Page 5   |
| <b>Methods</b>                         | <i>What did you do?</i>                                                                                                                                                                                                                                                                                                                                                                                          |          |
| <b>7. Context</b>                      | Contextual elements considered important at the outset of introducing the intervention(s)                                                                                                                                                                                                                                                                                                                        | Page 4   |
| <b>8. Intervention(s)</b>              | a. Description of the intervention(s) in sufficient detail that others could reproduce it<br>b. Specifics of the team involved in the work                                                                                                                                                                                                                                                                       | Page 4-5 |
| <b>9. Study of the Intervention(s)</b> | a. Approach chosen for assessing the impact of the intervention(s)<br>b. Approach used to establish whether the observed outcomes were due to the intervention(s)                                                                                                                                                                                                                                                | Page 5   |
| <b>10. Measures</b>                    | a. Measures chosen for studying processes and outcomes of the intervention(s), including rationale for choosing them, their operational definitions, and their validity and reliability<br>b. Description of the approach to the ongoing assessment of contextual elements that contributed to the success, failure, efficiency, and cost<br>c. Methods employed for assessing completeness and accuracy of data | Page 5   |
| <b>11. Analysis</b>                    | a. Qualitative and quantitative methods used to draw inferences from the data<br>b. Methods for understanding variation within the data, including the effects of time as a variable                                                                                                                                                                                                                             | Page 5-6 |
| <b>12. Ethical Considerations</b>      | Ethical aspects of implementing and studying the intervention(s) and how they were addressed, including, but not limited to, formal ethics review and potential conflict(s) of interest                                                                                                                                                                                                                          | Page 6   |

| <b>Results</b>            | <i>What did you find?</i>                                                                                                                                                                                                                                                                                                                                                                                                                                                                                                                                                                                                                                          |           |
|---------------------------|--------------------------------------------------------------------------------------------------------------------------------------------------------------------------------------------------------------------------------------------------------------------------------------------------------------------------------------------------------------------------------------------------------------------------------------------------------------------------------------------------------------------------------------------------------------------------------------------------------------------------------------------------------------------|-----------|
| <b>13. Results</b>        | <ul style="list-style-type: none"> <li>a. Initial steps of the intervention(s) and their evolution over time (<i>e.g.</i>, time-line diagram, flow chart, or table), including modifications made to the intervention during the project</li> <li>b. Details of the process measures and outcome</li> <li>c. Contextual elements that interacted with the intervention(s)</li> <li>d. Observed associations between outcomes, interventions, and relevant contextual elements</li> <li>e. Unintended consequences such as unexpected benefits, problems, failures, or costs associated with the intervention(s).</li> <li>f. Details about missing data</li> </ul> | Page 6    |
| <b>Discussion</b>         | <i>What does it mean?</i>                                                                                                                                                                                                                                                                                                                                                                                                                                                                                                                                                                                                                                          |           |
| <b>14. Summary</b>        | <ul style="list-style-type: none"> <li>a. Key findings, including relevance to the rationale and specific aims</li> <li>b. Particular strengths of the project</li> </ul>                                                                                                                                                                                                                                                                                                                                                                                                                                                                                          | Page 7-8  |
| <b>15. Interpretation</b> | <ul style="list-style-type: none"> <li>a. Nature of the association between the intervention(s) and the outcomes</li> <li>b. Comparison of results with findings from other publications</li> <li>c. Impact of the project on people and systems</li> <li>d. Reasons for any differences between observed and anticipated outcomes, including the influence of context</li> <li>e. Costs and strategic trade-offs, including opportunity costs</li> </ul>                                                                                                                                                                                                          | Page 7-8  |
| <b>16. Limitations</b>    | <ul style="list-style-type: none"> <li>a. Limits to the generalizability of the work</li> <li>b. Factors that might have limited internal validity such as confounding, bias, or imprecision in the design, methods, measurement, or analysis</li> <li>c. Efforts made to minimize and adjust for limitations</li> </ul>                                                                                                                                                                                                                                                                                                                                           | Page 8-9  |
| <b>17. Conclusions</b>    | <ul style="list-style-type: none"> <li>a. Usefulness of the work</li> <li>b. Sustainability</li> <li>c. Potential for spread to other contexts</li> <li>d. Implications for practice and for further study in the field</li> <li>e. Suggested next steps</li> </ul>                                                                                                                                                                                                                                                                                                                                                                                                | Page 9-10 |
| <b>Other information</b>  |                                                                                                                                                                                                                                                                                                                                                                                                                                                                                                                                                                                                                                                                    |           |
| <b>18. Funding</b>        | Sources of funding that supported this work. Role, if any, of the funding organization in the design, implementation, interpretation, and reporting                                                                                                                                                                                                                                                                                                                                                                                                                                                                                                                | Page 1    |
